# Supplementary material for: Active Visual Art Therapy and Health Outcomes: A Systematic Review and Meta-Analysis
Source: PubMed Central journal article supplement (PMC11393726; doi:10.1001/jamanetworkopen.2024.28709), 2024-09-12
Supplement: jamanetwopen-e2428709-s001.pdf [file jamanetwopen-e2428709-s001.pdf]

## Supplementary Online Content

Joschko R, Klatt C, Grabowska WA, Roll S, Berghöfer A, Willich SN. Active visual art therapy and health outcomes: a meta-analysis. *JAMA Netw Open*. 2024;7(8):e2428709. doi:10.1001/jamanetworkopen.2024.28709

**eAppendix.** Data Extraction Form

**eTable 1.** Characteristics of the Included Studies, Including the Short ID, Title, a Brief Description of the Study Population, Intervention and Control Group

**eTable 2.** Ongoing or Recently Published Studies That Investigate the Effectiveness of AVAT

**eFigure 1.** Forest Plot of the Effects of AVAT for Studies Presenting Results as Change From Baseline

**eFigure 2.** Forest Plot of the Effects of AVAT for Studies Presenting Results as Post-test

**eFigure 3.** Funnel Plot for Change From Baseline Outcomes

**eReferences**

This supplementary material has been provided by the authors to give readers additional information about their work.

## **eAppendix: Data extraction form.**

### **For each included study we extracted the following:**

| Study | Year | same study as | title | indication tag | population tag | population status | outcome tag | other | country | setting | age | age range | total women | total men | study design | study arms | outcome category | construct | scale | scale description | scaling | continuous vs dichotomous | imputation | ITT vs PP | N int randomised | N control randomised | pre intervention mean | pre intervention SD | pre intervention N | pre control mean | pre control SD | pre control N | total N beginning | post intervention mean | post intervention SD | post intervention N | post control mean | post control SD | post control N | weeks since baseline | MD intervention | SD MD intervention | MD control | SD MD control | total N end of study | Cohen's d reported | tendency | other measures | control group | art | materials used | material abbreviation | group type | therapeutical element | therapist qualification | mins per session | sessions per week | weeks of intervention | total minutes of intervention | timing | aim | funding | randomisation | bias from randomisation | randomisation in text | deviation from intended intervention bias | deviation from intended intervention bias in text | dropout missing outcome data bias | dropout missing outcome bias in text | dropout intervention group in percent | dropout control in percent | total dropout in percent | bias in measurement tool | bias in measurement tool explanation | bias in measurement of the outcome | bias in measurement outcome in text | selective reporting bias | selective reporting explanation | other bias | other bias description |

**eTable 1: Characteristics of the included studies, including the short ID, title, a brief description of the study population, intervention and control group.**

Papers reporting the same study share a bold outline. Studies included in the review but not the meta-analysis have a grey background.

| Study ID                     | Title                                                                                                                                          | Population                                                                | Materials                                               | Therapeutical element | Control group tag |
|------------------------------|------------------------------------------------------------------------------------------------------------------------------------------------|---------------------------------------------------------------------------|---------------------------------------------------------|-----------------------|-------------------|
| Abbing 2019 a <sup>1</sup>   | The Effectiveness of Art Therapy for Anxiety in Adult Women: A Randomized Controlled Trial.                                                    | Adult women with moderate to severe anxiety symptoms                      | Sculpting, Painting, Drawing/sketching                  | yes                   | Waitlist          |
| Abbing 2019 b <sup>2</sup>   | Anxiety reduction through art therapy in women. Exploring stress regulation and executive functioning as underlying neurocognitive mechanisms. | See above                                                                 | Sculpting, Painting, Drawing/sketching                  | yes                   | Waitlist          |
| Abdulah 2018 <sup>3</sup>    | Effectiveness of group art therapy on quality of life in paediatric patients with cancer: a randomized controlled trial                        | Children undergoing chemotherapy                                          | Painting, Arts and crafts, Drawing/sketching            | no                    | TAU               |
| Barfarazi 2018 <sup>4</sup>  | Evaluating the Effect of Painting Therapy on Happiness in the Elderly                                                                          | Older adults in elderly care centers                                      | Painting                                                | yes                   | TAU               |
| Bazargan 2016 <sup>5</sup>   | The Effectiveness of Art Therapy in Reducing Internalizing and Externalizing Problems of Female Adolescents                                    | Teenage girls with internalizing (n=30) and externalizing (n=30) problems | Painting, Drawing/sketching                             | yes                   | Not specified     |
| Beebe 2010 <sup>6</sup>      | A randomized trial to test the effectiveness of art therapy for children with asthma                                                           | School children with asthma                                               | Painting, Drawing/sketching, Sculpting, Arts and crafts | yes                   | Waitlist          |
| Beh-Pajooh 2018 <sup>7</sup> | The effectiveness of painting therapy program for the treatment of externalizing behaviours in children with intellectual disability           | Male children with intellectual disability in special need schools        | Painting, Drawing/sketching                             | no                    | No intervention   |

| Study ID                              | Title                                                                                                                                                         | Population                                                                                                 | Materials                                  | Therapeutical element | Control group tag         |
|---------------------------------------|---------------------------------------------------------------------------------------------------------------------------------------------------------------|------------------------------------------------------------------------------------------------------------|--------------------------------------------|-----------------------|---------------------------|
| Blomdahl 2018 <sup>8</sup>            | A manual-based phenomenological art therapy for individuals diagnosed with moderate to severe depression (PATd): a randomized controlled study                | Adults with moderate to severe depression without psychotic symptoms                                       | Painting, Drawing/sketching                | yes                   | TAU                       |
| Borchers 1985 <sup>9</sup>            | Do gains made in group art therapy persist? A study with aftercare patients                                                                                   | Adults with severe chronic mental illness after in-patient treatment                                       | Not specified                              | yes                   | TAU                       |
| Bozzatello 2019 <sup>10</sup>         | Effectiveness of psychosocial treatments on symptoms and functional domains in schizophrenia spectrum disorders: a prospective study in a real-world setting. | Adults with schizophrenia and related symptoms                                                             | Not specified                              | yes                   | Other: befriending group. |
| Broome 2001 <sup>11</sup> adolescents | An intervention to increase coping and reduce health care utilization for school-age children and adolescents with sickle cell disease                        | Schoolaged children/ adolescents who attended an information program about living with sickle cell disease | Drawing/sketching, Painting, Not specified | yes                   | TAU and CBT for pain      |
| Broome 2001 <sup>11</sup> children    | An intervention to increase coping and reduce health care utilization for school-age children and adolescents with sickle cell disease                        | Schoolaged children/ adolescents who attended an information program about living with sickle cell disease | Drawing/sketching, Painting, Not specified | yes                   | TAU and CBT for pain      |
| Cetinkaya 2019 <sup>12</sup>          | The Effect of Ceramic Painting on the Life Satisfaction and Cognitive Status of Older Adults Residing in a Nursing Home                                       | Older adults (65+), who were residing in nursing home, without dementia                                    | Colouring in/mandala, Painting             | no                    | No intervention           |

| Study ID                      | Title                                                                                                                                                    | Population                                                                                 | Materials                                               | Therapeutical element | Control group tag                                                                                                           |
|-------------------------------|----------------------------------------------------------------------------------------------------------------------------------------------------------|--------------------------------------------------------------------------------------------|---------------------------------------------------------|-----------------------|-----------------------------------------------------------------------------------------------------------------------------|
| Ching-Teng 2019 <sup>13</sup> | Positive effects of art therapy on depression and self-esteem of older adults in nursing homes                                                           | Older adults in long-term care institutes with intact mental functions and mild depression | Painting, Drawing/sketching, Arts and crafts, Other     | yes                   | TAU                                                                                                                         |
| Choi 2020 <sup>14</sup>       | The effects of combining art psychotherapy with pharmacotherapy in treating major depressive disorder: randomized control study                          | Adults with pharmacotherapy for major depressive disorder (MDD)                            | Drawing/sketching                                       | yes                   | TAU                                                                                                                         |
| Ciasca 2018 <sup>15</sup>     | Art therapy as an adjuvant treatment for depression in elderly women: a randomized controlled trial                                                      | Elderly women (60+) with major depressive disorder                                         | Painting, Drawing/sketching, Arts and crafts, Sculpting | yes                   | TAU                                                                                                                         |
| Crawford 2012 <sup>16</sup>   | Group art therapy as an adjunctive treatment for people with schizophrenia: multicentre pragmatic randomised trial                                       | Adults with schizophrenia                                                                  | Not specified                                           | yes                   | TAU                                                                                                                         |
| Leurent 2014 <sup>17</sup>    | Moderating factors for the effectiveness of group art therapy for schizophrenia: secondary analysis of data from the MATISSE randomised controlled trial | Adults with schizophrenia                                                                  | Not specified                                           | yes                   | TAU                                                                                                                         |
| Decker 2018 <sup>18</sup>     | Quantitatively Improved Treatment Outcomes for Combat-Associated PTSD With Adjunctive Art Therapy: randomized Controlled Trial                           | U.S. veterans with PTSD                                                                    | Drawing/sketching                                       | yes                   | Other: Cognitive processing therapy and supportive psychotherapy plus TAU (pharmacological therapy for PTSD and depression) |

| Study ID                        | Title                                                                                                                                                                                                                                | Population                                                                                                                                         | Materials                                               | Therapeutical element | Control group tag     |
|---------------------------------|--------------------------------------------------------------------------------------------------------------------------------------------------------------------------------------------------------------------------------------|----------------------------------------------------------------------------------------------------------------------------------------------------|---------------------------------------------------------|-----------------------|-----------------------|
| Ellis-Hill 2019 <sup>19</sup>   | HeART of Stroke: randomised controlled, parallel-arm, feasibility study of a community-based arts and health intervention plus usual care compared with usual care to increase psychological well-being in people following a stroke | Max. 2 years poststroke, community-dwelling adults and older adults                                                                                | Painting, Drawing/sketching, Sculpting, Arts and crafts | yes                   | TAU                   |
| Gussak 2006 <sup>20</sup>       | Effects of art therapy with prison inmates: a follow-up study                                                                                                                                                                        | Adult male prisoners, most taking medication for mental illness                                                                                    | Drawing/sketching, Sculpting                            | yes                   | No intervention = TAU |
| Gussak 2009 men <sup>21</sup>   | The effects of art therapy on male and female inmates: Advancing the research base                                                                                                                                                   | Adult male prisoners, a majority having an axis 1 diagnosis and taking medication                                                                  | Arts and crafts, Drawing/sketching                      | yes                   | No intervention = TAU |
| Gussak 2009 women <sup>21</sup> | The effects of art therapy on male and female inmates: Advancing the research base                                                                                                                                                   | Adult female prisoners, a majority having an axis 1 diagnosis and taking medication                                                                | Arts and crafts, Drawing/sketching                      | yes                   | No intervention = TAU |
| Haeyen 2018 <sup>22</sup>       | Efficacy of Art Therapy in Individuals With Personality Disorders Cluster B/C: a Randomized Controlled Trial                                                                                                                         | Adults with a primary diagnosis of at least one Axis II Personality Disorder cluster B and/or C or a personality disorder, not otherwise specified | Not specified                                           | yes                   | Waitlist              |

| Study ID                   | Title                                                                                                                   | Population                                                                                                                                                                                                        | Materials                                               | Therapeutical element | Control group tag                                      |
|----------------------------|-------------------------------------------------------------------------------------------------------------------------|-------------------------------------------------------------------------------------------------------------------------------------------------------------------------------------------------------------------|---------------------------------------------------------|-----------------------|--------------------------------------------------------|
| Hattori 2011 <sup>23</sup> | Controlled study on the cognitive and psychological effect of coloring and drawing in mild Alzheimer's disease patients | Older adults (65–85 years) who consulted the outpatient clinic and showing mild impairment of cognitive function (Mini-Mental State Examination score of 20 or higher)                                            | Colouring in/mandala, Drawing/sketching                 | maybe                 | Other: "learning therapy" involving simple calculation |
| Hill 2016 <sup>24</sup>    | Improving the Short-Term Affect of Grieving Children Through Art                                                        | Children (6-13years) who had experienced the death of a family member (either parent or sibling)                                                                                                                  | Painting                                                | no                    | Other: Attention control consisting of puzzling        |
| Hsiao 2020 <sup>25</sup>   | Effects of Art and Reminiscence Therapy on Agitated Behaviors Among Older Adults With Dementia                          | Older adults (55+) with mild/ moderate/ severe dementia (MMSE 18 +)                                                                                                                                               | Painting, Drawing/sketching, Sculpting, Arts and crafts | probably not          | TAU                                                    |
| Ilali 2018 <sup>26</sup>   | Impact of Art-Based Life Review on Depression Symptoms Among Older Adults                                               | Older adults (60+) with depression (Short Geriatric Depression Scale 11 or lower), not taking antidepressants, or stable on antidepressants for min. 3 months, and with an abbreviated Mental Test of 7 or higher | Painting, Drawing/sketching                             | yes                   | TAU                                                    |

| Study ID                     | Title                                                                                                                        | Population                                                                                               | Materials                              | Therapeutical element | Control group tag  |
|------------------------------|------------------------------------------------------------------------------------------------------------------------------|----------------------------------------------------------------------------------------------------------|----------------------------------------|-----------------------|--------------------|
| Jouybari 2018 <sup>27</sup>  | Comparison of the effect of narrative writing and art therapy on maternal stress in neonatal intensive care settings         | Mothers with a premature infant (born before 38 weeks' gestation) in NICU (neonatal intensive care unit) | Drawing/sketching                      | no                    | TAU                |
| Katz 2014 <sup>28</sup>      | The effect of drawing on children's experiences of investigations following alleged child abuse                              | Children who were alleged victims of sexual abuse (by a non-family member)                               | Drawing/sketching                      | yes                   | No intervention    |
| Khedekar 2017 <sup>29</sup>  | Use of art as therapeutic intervention for enhancement of hand function in patients with rheumatoid arthritis: a pilot study | Adults with rheumatoid arthritis Class II / III                                                          | Painting, Sculpting, Arts and crafts   | no                    | TAU                |
| Kim 2013 <sup>30</sup>       | A randomized, controlled study of the effects of art therapy on older Korean-Americans' healthy aging                        | Older Korean-American adults with MMSE > 25                                                              | Painting, Drawing/sketching, Sculpting | yes                   | TAU                |
| Kline 2020 <sup>31</sup>     | Randomized Trial of Therapy Dogs Versus Deliberative Coloring (Art Therapy) to Reduce Stress in Emergency Medicine Providers | Emergency Medicine providers working shift work                                                          | Colouring in/mandala                   | no                    | Other: Therapy dog |
| Kopytin 2013 <sup>32</sup>   | Humor, Self-Attitude, Emotions, and Cognitions in Group Art Therapy With War Veterans                                        | Hospitalised war veterans over 55 years with nonpsychotic mental disorders                               | Painting, Drawing/sketching            | yes                   | TAU                |
| Lalingkar 2020 <sup>33</sup> | Effect of recreational therapy on attention and depression in school children with learning difficulties                     | School children with any learning difficulty, MARS attention score > 50 and depression score > 13        | Colouring in/mandala, Sculpting        | no                    | TAU                |



| Study ID                     | Title                                                                                                                                               | Population                                                                                                                        | Materials                        | Therapeutical element | Control group tag                          |
|------------------------------|-----------------------------------------------------------------------------------------------------------------------------------------------------|-----------------------------------------------------------------------------------------------------------------------------------|----------------------------------|-----------------------|--------------------------------------------|
| Laurer 2015 <sup>34</sup>    | Effect of Art Production on Negative Mood and Anxiety for Adults in Treatment for Substance Abuse                                                   | Adults with substance abuse or dependence disorder                                                                                | Painting, Drawing/sketching      | no                    | Other: Viewing and sorting art             |
| Lawson 2016 <sup>35</sup>    | Effects of Making Art and Listening to Music on Symptoms Related to Blood and Marrow Transplantation                                                | Adults receiving blood and marrow transplantations                                                                                | Painting, Drawing/sketching      | no                    | TAU                                        |
| Liu 2018 <sup>36</sup>       | Examining the effectiveness of solution-focused art therapy (SF-AT) for sleep problems of children with traumatic experience                        | Children with traumatic experience                                                                                                | Arts and crafts, Other           | yes                   | TAU                                        |
| Lock 2017 <sup>37</sup>      | Feasibility Study Combining Art Therapy or Cognitive Remediation Therapy with Family-based Treatment for Adolescent Anorexia Nervosa                | Adolescents with anorexia nervosa who have obsessive–compulsive (OC) features and respond poorly to family-based treatment (FBT). | Drawing/sketching, Not specified | yes                   | Other: CBT and family based treatment      |
| Masika 2021 <sup>38</sup>    | Can Visual Art Therapy Be Implemented With Illiterate Older Adults With Mild Cognitive Impairment? A Pilot Mixed-Method Randomized Controlled Trial | Older adults with mild cognitive impairment (MCI) with no literacy and increased risk of progression to dementia                  | Drawing/sketching                | yes                   | Other: Attention control; health education |
| McCaffrey 2007 <sup>39</sup> | The effect of healing gardens and art therapy on older adults with mild to moderate depression.                                                     | Older adults with depression (self-diagnosed or diagnosed by a healthcare provider), who are able to walk 7-10 miles              | Drawing/sketching                | yes                   | Other: Attention control; garden walks     |

| Study ID                  | Title                                                                                                                                             | Population                                                                                                                                       | Materials                                                      | Therapeutical element | Control group tag    |
|---------------------------|---------------------------------------------------------------------------------------------------------------------------------------------------|--------------------------------------------------------------------------------------------------------------------------------------------------|----------------------------------------------------------------|-----------------------|----------------------|
| Montag 2014 <sup>40</sup> | A pilot RCT of psychodynamic group art therapy for patients in acute psychotic episodes: feasibility, impact on symptoms and mentalising capacity | Adults in inpatient treatment with schizophrenia                                                                                                 | Painting, Drawing/sketching, Sculpting                         | yes                   | TAU                  |
| Morris 2019 <sup>41</sup> | Art participation for psychosocial wellbeing during stroke rehabilitation: a feasibility randomised controlled trial                              | Medically stable stroke survivors participating in usual rehabilitation therapies with a planned rehabilitation duration of at least three weeks | Painting, Drawing/sketching, Sculpting, Arts and crafts        | yes                   | TAU                  |
| Narme 2012 <sup>42</sup>  | Nonpharmacological treatment for Alzheimer's disease: comparison between musical and non-musical interventions                                    | Adults with moderate to severe Alzheimer's disease                                                                                               | Painting                                                       | yes                   | Other: music therapy |
| Omizo 1989 <sup>43</sup>  | Art Activities to Improve Self-Esteem Among Native Hawaiian Children                                                                              | Hawaiian or part-hawaiian children from lower-middle to lower socioeconomic backgrounds                                                          | Painting, Drawing/sketching, Sculpting, Arts and crafts, Other | yes                   | No intervention      |

| Study ID                  | Title                                                                                                                              | Population                                                                                                                                                                                                                                     | Materials                                    | Therapeutical element | Control group tag |
|---------------------------|------------------------------------------------------------------------------------------------------------------------------------|------------------------------------------------------------------------------------------------------------------------------------------------------------------------------------------------------------------------------------------------|----------------------------------------------|-----------------------|-------------------|
| Öster 2006 <sup>44</sup>  | Art therapy improves coping resources: A randomized, controlled study among women with breast cancer                               | Women with newly diagnosed, nonmetastatic breast cancer, who don't have dementia or severe psychiatric illness, receiving postoperative radiotherapy. 9 women of the study group and 10 women of the control group also received chemotherapy. | Painting, Drawing/sketching, Arts and crafts | yes                   | TAU               |
| Öster 2007 <sup>45</sup>  | Art therapy for women with breast cancer: The therapeutic consequences of boundary strengthening                                   | See above                                                                                                                                                                                                                                      | Painting, Drawing/sketching, Arts and crafts | yes                   | TAU               |
| Öster 2014 <sup>46</sup>  | Art therapy during radiotherapy - A five-year follow-up study with women diagnosed with breast cancer                              | See above                                                                                                                                                                                                                                      | Painting, Drawing/sketching, Arts and crafts | yes                   | TAU               |
| Thyme 2009 <sup>47</sup>  | Individual brief art therapy can be helpful for women with breast cancer: A randomized controlled clinical study                   | See above                                                                                                                                                                                                                                      | Painting, Drawing/sketching, Arts and crafts | yes                   | TAU               |
| Svensk 2009 <sup>48</sup> | Art therapy improves experienced quality of life among women undergoing treatment for breast cancer: A randomized controlled study | See above                                                                                                                                                                                                                                      | Painting, Drawing/sketching, Arts and crafts | yes                   | TAU               |

| Study ID                     | Title                                                                                                                                                                                   | Population                                                                                                            | Materials                                           | Therapeutical element | Control group tag                                                                             |
|------------------------------|-----------------------------------------------------------------------------------------------------------------------------------------------------------------------------------------|-----------------------------------------------------------------------------------------------------------------------|-----------------------------------------------------|-----------------------|-----------------------------------------------------------------------------------------------|
| Pongan 2017 <sup>49</sup>    | Can Musical or Painting Interventions Improve Chronic Pain, Mood, Quality of Life, and Cognition in Patients with Mild Alzheimer's Disease? Evidence from a Randomized Controlled Trial | Older adults (60+) with probable Alzheimer disease at minor cognitive disorder or mild major cognitive disorder stage | Painting                                            | probably not          | Other: choral singing                                                                         |
| Qin 2020 <sup>50</sup>       | Effect of music therapy intervention on physical functions and mental health of patients with ankylosing spondylitis                                                                    | Hospitalized patients with ankylosing spondylitis (AS)                                                                | Painting, Drawing/sketching                         | probably not          | TAU                                                                                           |
| Agbaria 2020 <sup>51</sup>   | Acquiring social and cognitive skills in an intervention for Arab parents of children with intellectual developmental disability accompanied by behavioral conditions.                  | Parents of children with minor IDD (intellectual developmental disability) who attend a special education school      | Painting                                            | maybe                 | Other: CBT                                                                                    |
| Rajendran 2020 <sup>52</sup> | Randomized Controlled Trial of Adult Therapeutic Coloring for the Management of Significant Anxiety in the Emergency Department                                                         | Adult patients waiting in the emergency department                                                                    | Colouring in/mandala                                | no                    | Other: Attention control; Pen and Paper                                                       |
| Ramirez 2020 <sup>53</sup>   | Investigating impact: the effects of school-based art therapy on adolescent boys living in poverty                                                                                      | Male adolescents living in poverty and attending a private school                                                     | Drawing/sketching, Sculpting, Arts and crafts       |                       | Other: Attention control; doing homework assigned by other teachers or interacting with peers |
| Rao 2009 <sup>54</sup>       | Art therapy for relief of symptoms associated with HIV/AIDS                                                                                                                             | People living with HIV/AIDS                                                                                           | Painting, Drawing/sketching, Arts and crafts, Other | yes                   | Other: Attention control; videotape on the uses of art therapy                                |

| Study ID                      | Title                                                                                                                              | Population                                                                                                                       | Materials                                                          | Therapeutical element | Control group tag                                                                            |
|-------------------------------|------------------------------------------------------------------------------------------------------------------------------------|----------------------------------------------------------------------------------------------------------------------------------|--------------------------------------------------------------------|-----------------------|----------------------------------------------------------------------------------------------|
| Regev 2005 <sup>55</sup>      | The psychological benefits of artwork: the case of children with learning disorders                                                | Primary-school children with learning disorders                                                                                  | Painting, Sculpting, Arts and crafts                               | yes                   | No intervention                                                                              |
| Richardson 2007 <sup>56</sup> | Exploratory RCT of art therapy as an adjunctive treatment in schizophrenia                                                         | Outpatient adults (mental health service users) with a diagnosis of chronic schizophrenia, not in other psychological treatment. | Not specified                                                      | yes                   | TAU                                                                                          |
| Robinson 2018 <sup>57</sup>   | Randomized Trial Evaluating the Effectiveness of Coloring on Decreasing Anxiety Among Parents in a Pediatric Surgical Waiting Area | Parents of children undergoing surgery                                                                                           | Colouring in/mandala                                               | no                    | No intervention                                                                              |
| Rosal 1993 <sup>58</sup>      | Comparative group art therapy research to evaluate changes in locus of control in behavior disordered children                     | 4th, 5th and 6th graders of a primary school in a housing commission, with moderate to severe behaviour problems                 | Painting, Drawing/sketching, Sculpting, Arts and crafts            | yes                   | Not specified, probably no intervention                                                      |
| Roswiyani 2020 <sup>59</sup>  | Art activities and qigong exercise for the well-being of older adults in nursing homes in Indonesia: a randomized controlled trial | Older adults living in nursing homes for at least 3 month, with a Mini-Mental State Examination (MMSE) score 18 or more          | Drawing/sketching, Colouring in/mandala, Arts and crafts, Painting | yes                   | No intervention                                                                              |
| Rusted 2006 <sup>60</sup>     | A multi-centre randomized control group trial on the use of art therapy for older people with dementia                             | Older adults with dementia                                                                                                       | Not specified                                                      | yes                   | Other: Attention control; activity groups not involving art or occupational therapy elements |

| Study ID                    | Title                                                                                                                                                                               | Population                                                                                                                                            | Materials           | Therapeutical element | Control group tag                                               |
|-----------------------------|-------------------------------------------------------------------------------------------------------------------------------------------------------------------------------------|-------------------------------------------------------------------------------------------------------------------------------------------------------|---------------------|-----------------------|-----------------------------------------------------------------|
| Schrade 2011 <sup>61</sup>  | Physiological effects of mandala making in adults with intellectual disability                                                                                                      | Adults and older adults with mental disability who attended a day program at a non-profit agency                                                      | Drawing/sketching   | no                    | Other: Attention control consisting of puzzling and table games |
| Schreier 2005 <sup>62</sup> | Posttraumatic stress symptoms in children after mild to moderate pediatric trauma: a longitudinal examination of symptom prevalence, correlates, and parent-child symptom reporting | Children and adolescents (7-17) who were hospitalized for at least 24h after a physical injury, and showing at least mild trauma symptoms             | Drawing/sketching   | yes                   | TAU                                                             |
| Siegel 2016 <sup>63</sup>   | Expressive arts therapy for hospitalized children: a pilot study measuring cortisol levels                                                                                          | Children and adolescents (3-17) who are hospitalised for various reasons (dog attack, cancer, acute asthma, perforated appendicitis, encopresis etc.) | Other               | yes                   | Waitlist                                                        |
| Yount 2013 <sup>64</sup>    | Expressive arts therapy for hospitalized children: a pilot study measuring cortisol levels                                                                                          | See above                                                                                                                                             | Other               | yes                   | Waitlist                                                        |
| Sommer 2001 <sup>65</sup>   | Creative-dynamic image synthesis: a useful addition to the treatment options for impotence                                                                                          | Adult men with erectile dysfunction of no known organic cause                                                                                         | Drawing/sketching   | yes                   | Other                                                           |
| Sterz 2013 <sup>66</sup>    | Creative arts therapy improves quality of life in MS - Results of a randomized controlled trial during inpatient rehabilitation                                                     | Patients with multiple sclerosis during an inpatient rehabilitation                                                                                   | Painting, Sculpting | yes                   | Attention contrl                                                |

| <b>Study ID</b>             | <b>Title</b>                                                                                                                                    | <b>Population</b>                                                                                                              | <b>Materials</b>                 | <b>Therapeutical element</b> | <b>Control group tag</b> |
|-----------------------------|-------------------------------------------------------------------------------------------------------------------------------------------------|--------------------------------------------------------------------------------------------------------------------------------|----------------------------------|------------------------------|--------------------------|
| Sükrü 2018 <sup>67</sup>    | The impact of a six-month interpersonal group psychotherapy on functionality of patients with schizophrenia in a community mental health center | Adults with early (onset within the last 5 years) schizophrenia receiving antipsychotic medication                             | Painting                         | maybe                        | Waitlist                 |
| Thyme 2007 <sup>68</sup>    | The outcome of short-term psychodynamic art therapy compared to short-term psychodynamic verbal therapy for depressed women                     | Adult women with depression or dysthymic disorder, who are not using psychopharmacological treatment                           | Not specified, Drawing/sketching | yes                          | Other                    |
| Tibbetts 1990 <sup>69</sup> | Short-term art therapy with seriously emotionally disturbed adolescents                                                                         | "Seriously emotionally disturbed" adolescents enrolled in a "Los Angeles County Office of Education Special Class Alternative" | Not specified                    | yes                          | Attention control        |
| Wahlbeck 2020 <sup>70</sup> | Art Therapy and Counseling for Fear of Childbirth: a Randomized Controlled Trial                                                                | Pregnant adult women with a pronounced fear of childbirth                                                                      | Painting                         | yes                          | TAU                      |
| Wu 2020 <sup>71</sup>       | After the intervention after the intervention an evaluation and analysis of visual art therapy in the treatment of PTSD                         | Adults diagnosed with PTSD                                                                                                     | Painting, Other                  | yes                          | TAU                      |
| Yamada 2010 <sup>72</sup>   | A randomised clinical trial of a wellness programme for healthy older people                                                                    | Community dwelling older adults taking part in a wellness programme                                                            | Arts and crafts                  | no                           | Other                    |

| <b>Study ID</b>        | <b>Title</b>                                                                                               | <b>Population</b>                                                                                           | <b>Materials</b>             | <b>Therapeutical element</b> | <b>Control group tag</b> |
|------------------------|------------------------------------------------------------------------------------------------------------|-------------------------------------------------------------------------------------------------------------|------------------------------|------------------------------|--------------------------|
| Yan 2019 <sup>73</sup> | School bullying among left-behind children: the efficacy of art therapy on reducing bullying victimization | Left-behind children: children in rural areas whose parents left for more than 6 months to work in the city | Painting, Drawing/ sketching | yes                          | No intervention          |
| Yu 2016 <sup>74</sup>  | House-Tree-Person drawing therapy as an intervention for prisoners' prerelease anxiety                     | Male adult prisoners who will be released from prison in 2-6 months and potentially suffer from anxiety     | Drawing/ sketching           | yes                          | TAU                      |



**eTable 2: Ongoing or recently published studies that investigate the effectiveness of AVAT**

| Reference                                | Title                                                                                                                                                                                                                                                           |
|------------------------------------------|-----------------------------------------------------------------------------------------------------------------------------------------------------------------------------------------------------------------------------------------------------------------|
| Bacha 2019 <sup>75</sup>                 | Impact of art therapy on brain connectivity in recent post-stroke aphasia (ART-CONNECT)                                                                                                                                                                         |
| Beauchet 2020 <sup>76</sup>              | Effects of "Thursdays at the Museum" at the Montreal Museum of Fine Arts on the mental and physical health of older community dwellers: The art-health randomized clinical trial protocol                                                                       |
| Chan 2021 <sup>77</sup>                  | A randomised controlled trial of expressive arts-based intervention for young stroke survivors                                                                                                                                                                  |
| DRKS00012417 2020 <sup>78</sup>          | Art therapy as a preventive or interventional treatment for geriatric patients                                                                                                                                                                                  |
| DRKS00013301 2018 <sup>79</sup>          | Art therapy to regulate hypertension - a quantitative, controlled study                                                                                                                                                                                         |
| DRKS00021092 2020 <sup>80</sup>          | Older Adults in Nuremberg and art therapy                                                                                                                                                                                                                       |
| DRKS00022989 2020 <sup>81</sup>          | Psycho-biological treatment effects of trauma-focused art therapy in patients with psychological and physical trauma consequences                                                                                                                               |
| Guillaume 2021                           | The effects of an 8-week knitting program on osteoarthritis symptoms in elderly women: A pilot randomized controlled trial                                                                                                                                      |
| Guitard 2018                             | The knitting community-based trial for older women with osteoarthritis of the hands: design and rationale of a randomized controlled trial                                                                                                                      |
| IRCT20200104046002N 1 2020 <sup>82</sup> | The effect of art therapy on anxiety and quality of life following pregnancy loss                                                                                                                                                                               |
| ISRCTN96947690 2020 <sup>82</sup>        | The effects of art therapy with clay on emotion regulation, stress, and hormone levels in secondary school students                                                                                                                                             |
| Joly 2016 <sup>83</sup>                  | Impact of art therapy (AT) on fatigue and quality of life (QoL) during adjuvant external beam irradiation (EBI) in breast cancer patients (pts): a randomized trial                                                                                             |
| Lee 2019 <sup>84</sup>                   | T103. The effects of group arts therapy based on emotion management training on the emotional expression, alexithymia, depression and quality of life in patients with schizophrenia...2019 congress of the schizophrenia international research society, 10-14 |
| Matus 2020 <sup>85</sup>                 | Impact of waiting room art intervention on pediatric patients' anxiety and cooperation with physician                                                                                                                                                           |
| Naveed 2020 <sup>86</sup>                | A comparison of group art therapy in decreasing the depression level of leukaemia paediatric patients                                                                                                                                                           |
| NCT03820843 2019 <sup>75</sup>           | Impact of Art Therapy on Brain Connectivity in Recent Post-Stroke Aphasia                                                                                                                                                                                       |
| NCT04195217 2019 <sup>87</sup>           | Application of Art Therapy in Oncology: evaluation of the Symptomatic of Patients Suffering From a Cancerous Disease                                                                                                                                            |
| NCT04493034 2020 <sup>88</sup>           | Assessing the Benefit of Art & Music Therapy on Quality of Life in Patients With Breast Cancer                                                                                                                                                                  |
| NCT04524260 2020 <sup>89</sup>           | The Effects of Perioperative Painting Art Therapy (LOMÅ® Solution Centered Art Therapy) in Surgical Patients                                                                                                                                                    |
| NCT04548115 2020 <sup>90</sup>           | ARTISAN 2.0: deconstructing the Integrative Efficacy of a Multimodal Art-based Intervention                                                                                                                                                                     |
| NCT04714255 2022 <sup>91</sup>           | Effectiveness of Distraction (Art Therapy) on Reducing Pain and Anxiety During Intravenous Cannulation                                                                                                                                                          |
| Pieper 2020 <sup>92</sup>                | The UPGRADE study protocol: creative strengthening groups as an innovative preventive intervention for healthcare workers                                                                                                                                       |
| Gohier 2019 <sup>93</sup>                | Impact of Art Therapy on Alexithymia in People With Alcohol Use Disorder                                                                                                                                                                                        |

eFigure 1. Forest plot of the effects of AVAT for studies presenting results as change from baseline

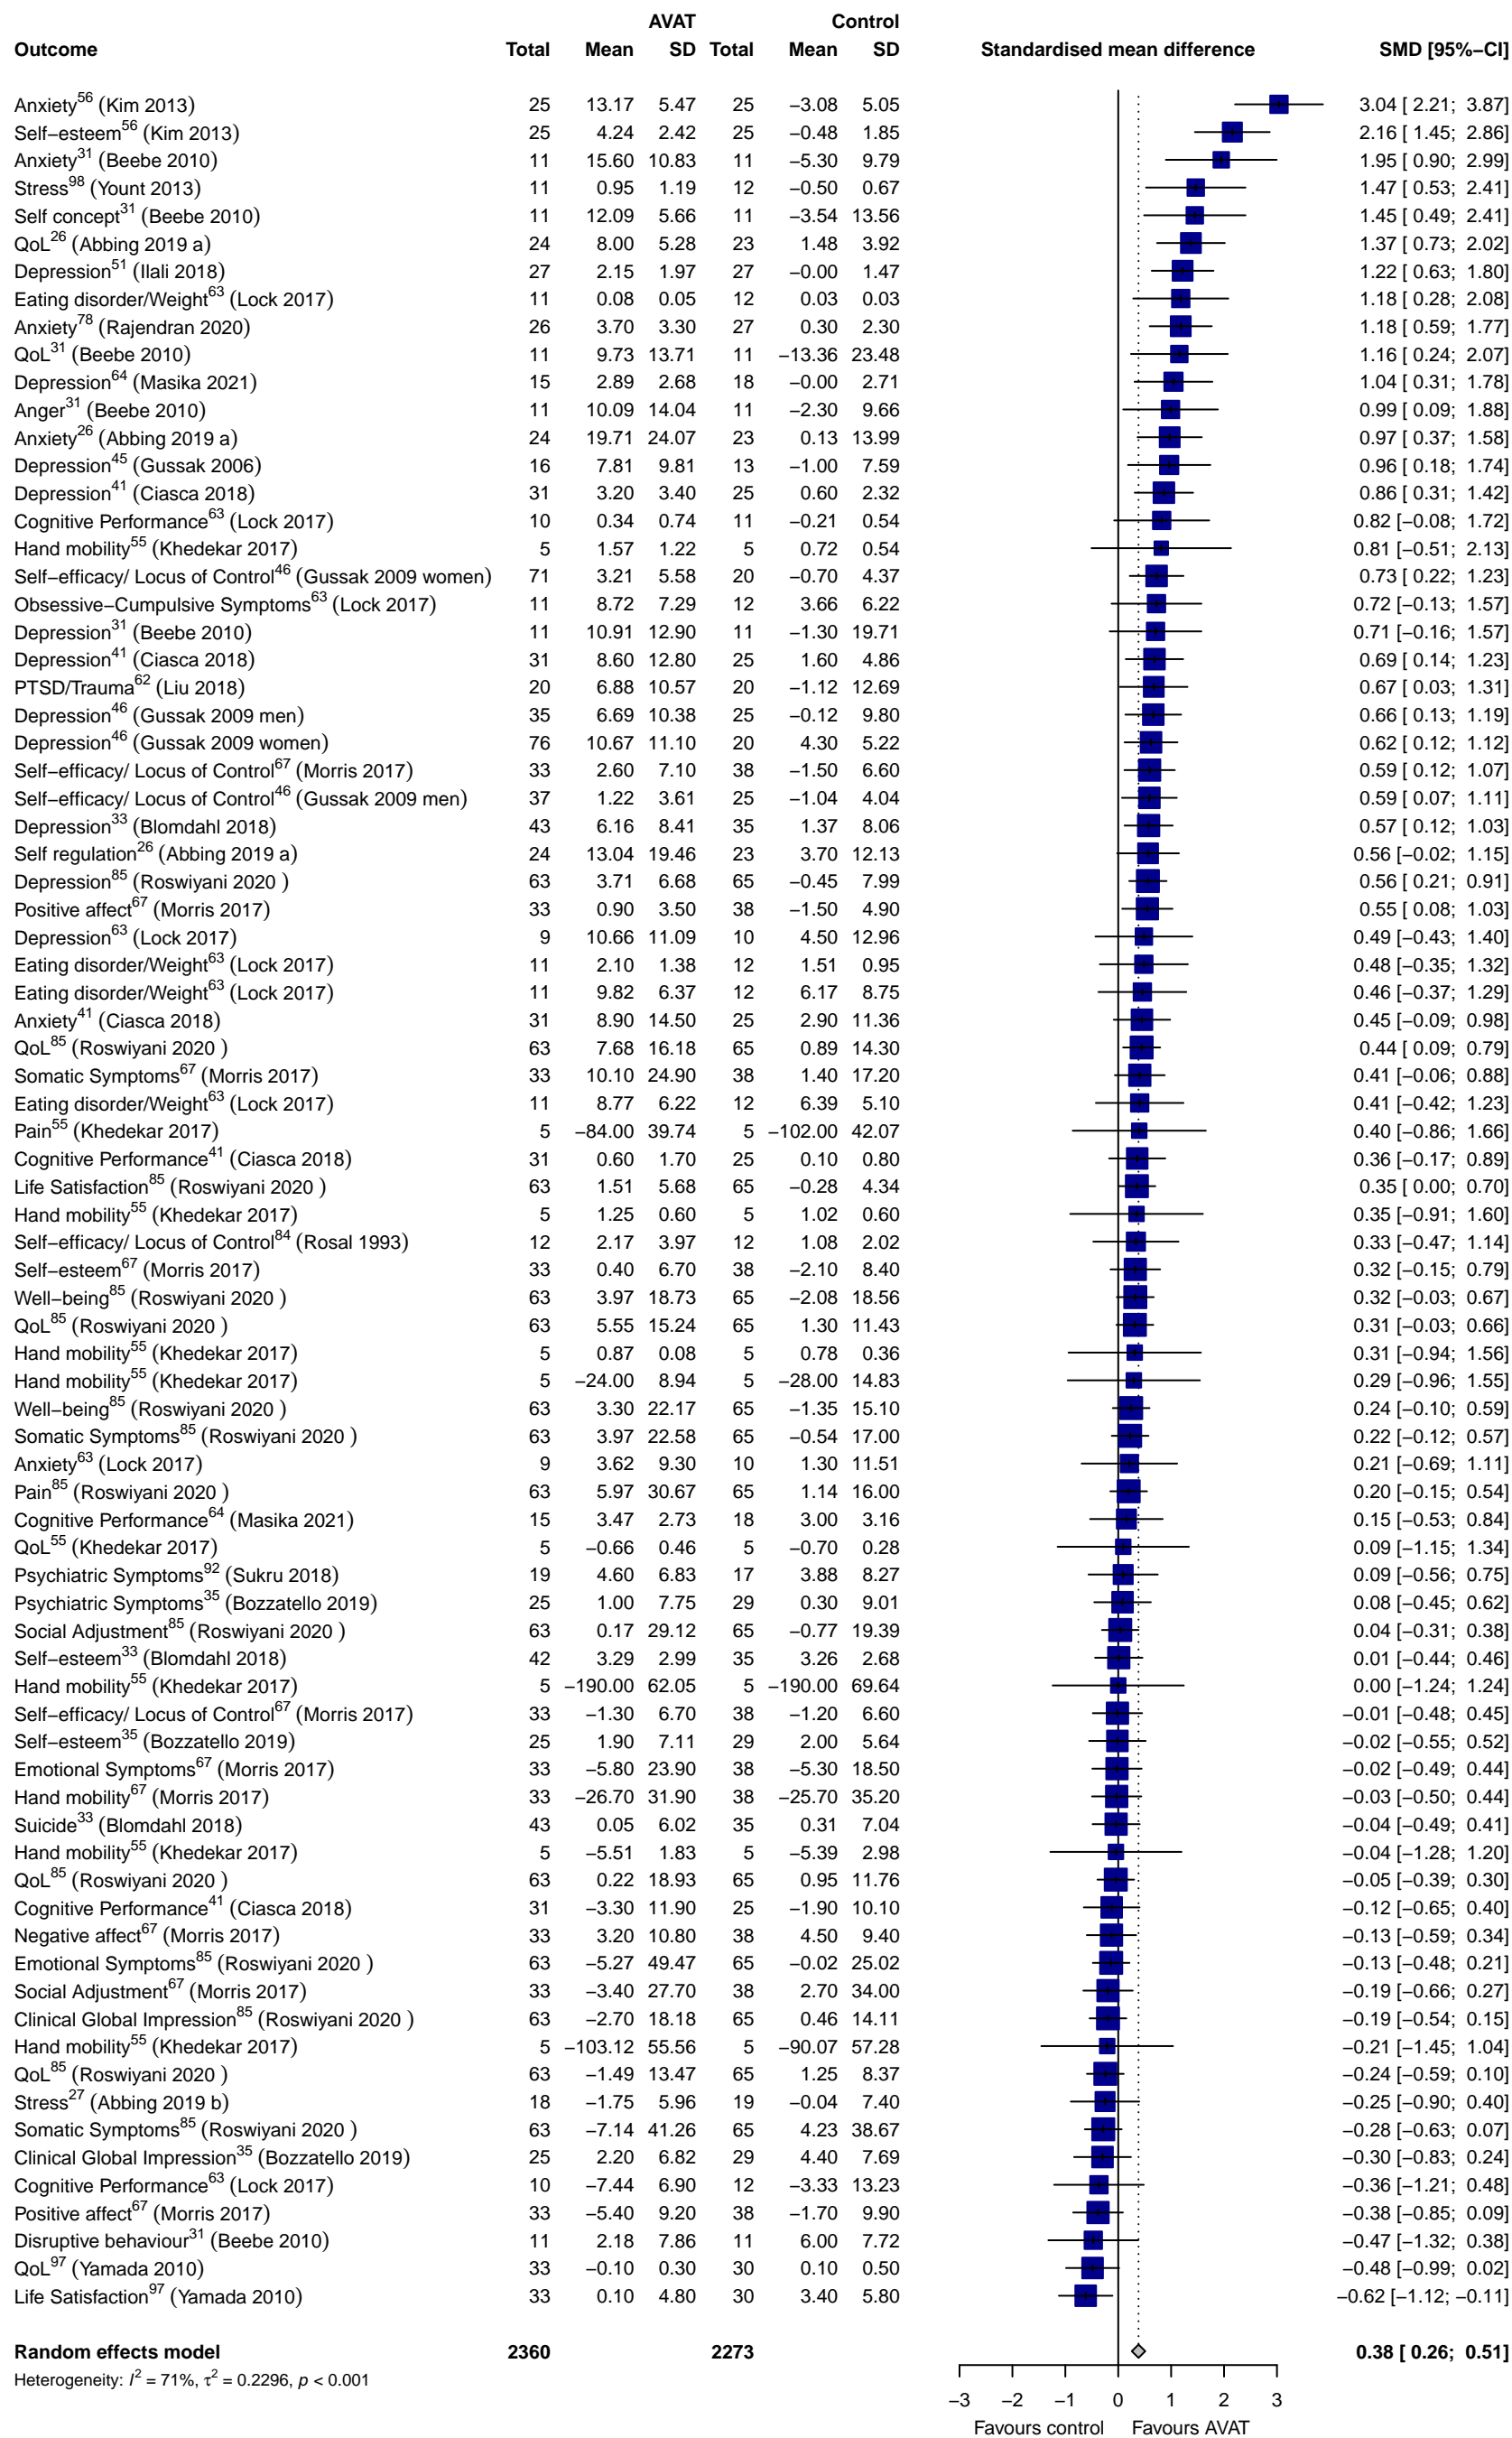



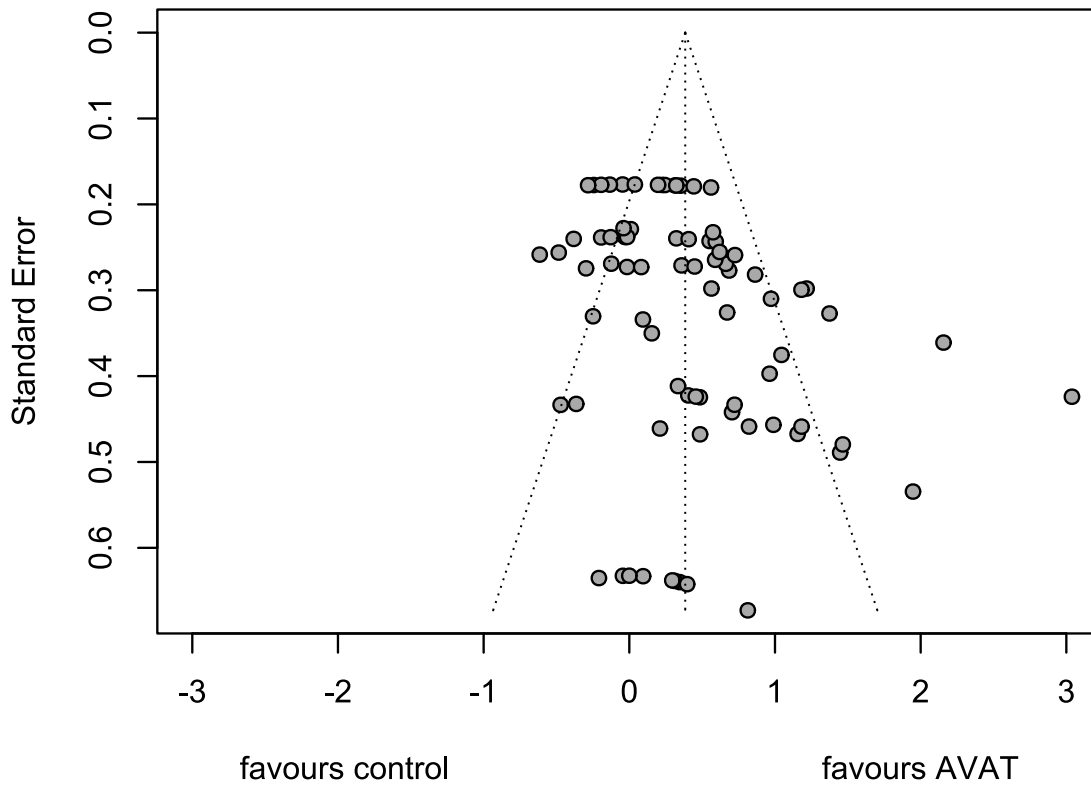

eFigure 3: Funnel plot for change from baseline outcomes.

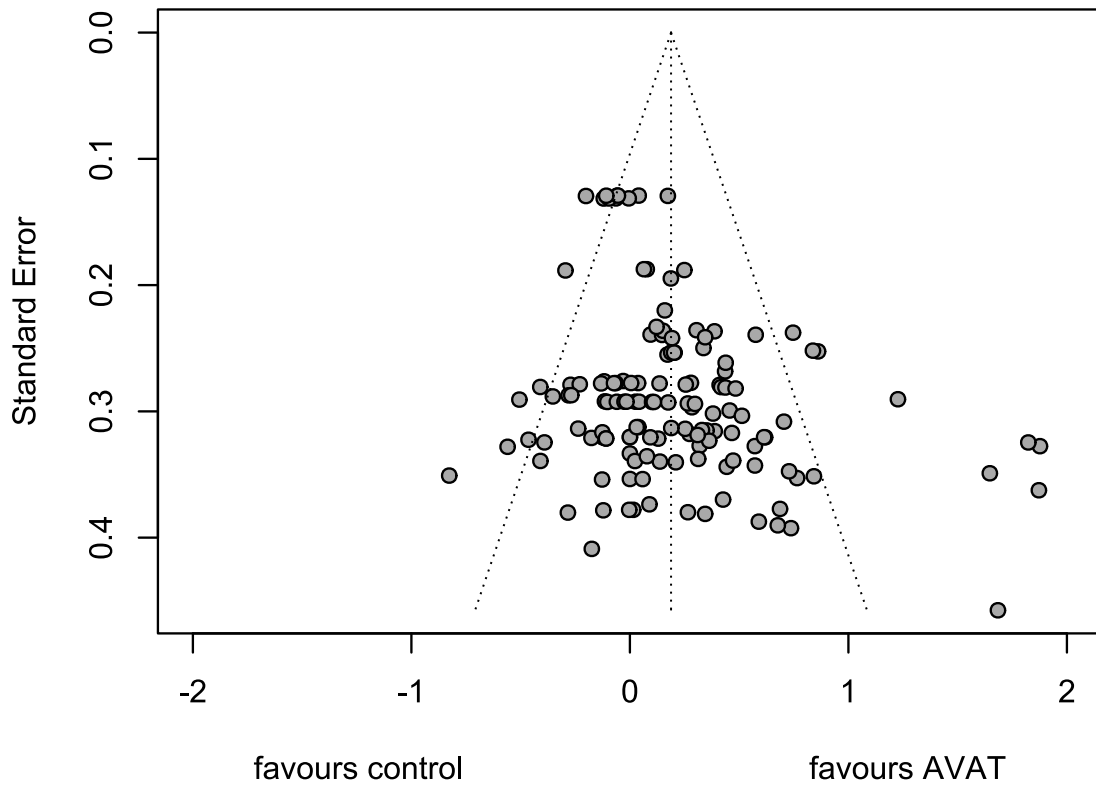

*eFigure 4. Funnel plot for post-test outcomes.*

## eReferences

1. Abbing A, Baars EW, de Sonnevile L, Ponstein AS, Swaab H. The Effectiveness of Art Therapy for Anxiety in Adult Women: A Randomized Controlled Trial. *Frontiers in psychology*. 2019;10(101550902):1203.
2. Abbing A, de Sonnevile L, Baars E, Bourne D, Swaab H. Anxiety reduction through art therapy in women. Exploring stress regulation and executive functioning as underlying neurocognitive mechanisms. *PLOS ONE*. 2019;14(12):e0225200-e0225200.
3. Abdulah DM, Abdulla BMO. Effectiveness of group art therapy on quality of life in paediatric patients with cancer: A randomized controlled trial. *Complement Ther Med*. 2018;41:180-185.
4. Barfarazi H, Pourghaznein T, Mohajer S, Mazlom SR, Asgharinekah SM. Evaluating the Effect of Painting Therapy on Happiness in the Elderly. 2018;8(3):17-26.
5. Bazargan Y, Pakdaman S. The Effectiveness of Art Therapy in Reducing Internalizing and Externalizing Problems of Female Adolescents. *Arch Iran Med*. 2016;19(1):51-56.
6. Beebe A, Bender B. A Randomized Trial To Test The Effectiveness Of Art Therapy For Children With Asthma. 2009;123(2 Suppl 1):S64.
7. Beh-Pajoo A, Abdollahi A, Hosseinian S. The effectiveness of painting therapy program for the treatment of externalizing behaviors in children with intellectual disability. *Vulnerable Children and Youth Studies*. 2018;13(3):221-227.
8. Blomdahl C, Guregård S, Rusner M, Wijk H. A manual-based phenomenological art therapy for individuals diagnosed with moderate to severe depression (PATd): A randomized controlled study. *Psychiatric Rehabilitation Journal*. 2018;41(3):169-182.
9. Borchers KK. Do gains made in group art therapy persist? A study with aftercare patients. 1985;23(3):89-91.
10. Bozzatello P, Bellino S, De Marzi G, et al. Effectiveness of psychosocial treatments on symptoms and functional domains in schizophrenia spectrum disorders: a prospective study in a real-world setting. *Disability & Rehabilitation*. 2019;41(23):2799-2806.
11. Broome ME, Maikler V, Kelber S, Bailey P, Lea G. An intervention to increase coping and reduce health care utilization for school-age children and adolescents with sickle cell disease. 2001;12(2):6-14.
12. Çetinkaya F, Aşiret G, Direk F, Özkanlı N. The Effect of Ceramic Painting on the Life Satisfaction and Cognitive Status of Older Adults Residing in a Nursing Home. *Topics in Geriatric Rehabilitation*. 2019;35:108-112.
13. Ching-Teng Y, Ya-Ping Y, Yu-Chia C. Positive effects of art therapy on depression and self-esteem of older adults in nursing homes. *Soc Work Health Care*. 2019;58(3):324-338.
14. Choi H, Jung D-J, Jeon Y-H, Kim MJ. The effects of combining art psychotherapy with pharmacotherapy in treating major depressive disorder: Randomized control study. *The Arts in Psychotherapy*. 2020;70:101689.
15. Ciasca EC, Ferreira RC, Santana CLA, et al. Art therapy as an adjuvant treatment for depression in elderly women: a randomized controlled trial. *Braz J Psychiatry*. 2018;40(3):256-263.
16. Crawford MJ, Killaspy H, Barnes TR, et al. Group art therapy as an adjunctive treatment for people with schizophrenia: a randomised controlled trial (MATISSE). 2012;16(8):iii-iv, 1-76.
17. Leurent B, Killaspy H, Osborn DP, et al. Moderating factors for the effectiveness of group art therapy for schizophrenia: secondary analysis of data from the MATISSE randomised controlled trial. *Social Psychiatry and Psychiatric Epidemiology*. 2014;49(11):1703-1710.
18. Decker KP, Deaver SP, Abbey V, Campbell M, Turpin C. Quantitatively Improved Treatment Outcomes for Combat-Associated PTSD With Adjunctive Art Therapy: randomized Controlled Trial. 2018;35(4):184-194.
19. Ellis-Hill C, Thomas S, Gracey F, et al. HeART of Stroke: randomised controlled, parallel-arm, feasibility study of a community-based arts and health intervention plus usual care compared

- with usual care to increase psychological well-being in people following a stroke. 2019;9(3):e021098.
20. Gussak D. Effects of art therapy with prison inmates: A follow-up study. *Arts in Psychotherapy*. 2006;33(3):188-198.
  21. Gussak D. The effects of art therapy on male and female inmates: Advancing the research base. *Arts in Psychotherapy*. 2009;36(1):5-12.
  22. Haeyen S, van Hooren S, van der Veld W, Hutschemaekers G. Efficacy of Art Therapy in Individuals With Personality Disorders Cluster B/C: A Randomized Controlled Trial. *J Pers Disord*. 2018;32(4):527-542.
  23. Hattori H, Hattori C, Hokao C, Mizushima K, Mase T. Controlled study on the cognitive and psychological effect of coloring and drawing in mild Alzheimer's disease patients. *Geriatr Gerontol Int*. 2011;11(4):431-437.
  24. Hill KE, Lineweaver TT. Improving the Short-Term Affect of Grieving Children Through Art. 2016;33(2):91-98.
  25. Hsiao CY, Chen SL, Hsiao YS, Huang HY, Yeh SH. Effects of Art and Reminiscence Therapy on Agitated Behaviors Among Older Adults With Dementia. *J Nurs Res*. 2020;28(4):e100.
  26. Ilali ES, Mokhtary F, Mousavinasab N, Targari AH. Impact of Art-Based Life Review on Depression Symptoms Among Older Adults. 2018;35(3):148-155.
  27. Jouybari L, Abbariki E, Jebeli M, et al. Comparison of the effect of narrative writing and art therapy on maternal stress in neonatal intensive care settings. 2018.
  28. Katz C, Barnett Z, Hershkowitz I. The effect of drawing on children's experiences of investigations following alleged child abuse. *Child Abuse Negl*. 2014;38(5):858-867.
  29. Khedekar S, Shimpi AP, Shyam A, Sancheti P. Use of Art as Therapeutic Intervention for Enhancement of Hand Function in Patients with Rheumatoid Arthritis: A Pilot Study. *Indian Journal of Rheumatology*. 2017;12(2).
  30. Kim SK. A randomized, controlled study of the effects of art therapy on older Korean-Americans' healthy aging. *The Arts in Psychotherapy*. 2013;40(1):158-164.
  31. Kline JA, Vanryzin K, Davis JC, et al. Randomized Trial of Therapy Dogs Versus Deliberative Coloring (Art Therapy) to Reduce Stress in Emergency Medicine Providers. *Academic Emergency Medicine*. 2020;27(4):266-275.
  32. Kopytin A, Lebedev A. Humor, Self-Attitude, Emotions, and Cognitions in Group Art Therapy With War Veterans. 2013;30(1):20-29.
  33. Lalingkar RA, Yadav TS, Gijare SS. Effect of Recreational Therapy on Attention and Depression in School Children with Learning Difficulties. *Indian Journal of Public Health Research & Development*. 2020;11(3):573-578.
  34. Laurer M, van der Venet R. Effect of Art Production on Negative Mood and Anxiety for Adults in Treatment for Substance Abuse. 2015;32(4):177-183.
  35. Lawson LM, Williams P, Glennon C, et al. Effect of Art Making on Cancer-Related Symptoms of Blood and Marrow Transplantation Recipients. 2012;39(4):E353.
  36. Liu C. *Examining the effectiveness of solution-focused art therapy (SF-AT) for sleep problems of children with traumatic experience* [Dissertation], ProQuest Information & Learning; 2018.
  37. Lock J, Fitzpatrick KK, Agras WS, Weinbach N, Jo B. Feasibility Study Combining Art Therapy or Cognitive Remediation Therapy with Family-based Treatment for Adolescent Anorexia Nervosa. *European Eating Disorders Review*. 2018;26(1):62-68.
  38. Masika GM, Yu DSF, Li PWC. Can Visual Art Therapy Be Implemented With Illiterate Older Adults With Mild Cognitive Impairment? A Pilot Mixed-Method Randomized Controlled Trial. 2021;34(1):76-86.
  39. McCaffrey R. The effect of healing gardens and art therapy on older adults with mild to moderate depression. *Holistic Nursing Practice*. 2007;21(2):79-84.
  40. Montag C, Haase L, Seidel D, et al. A pilot RCT of psychodynamic group art therapy for patients in acute psychotic episodes: feasibility, impact on symptoms and mentalising capacity. *PLoS One*. 2014;9(11):e112348.

41. Morris JH, Kelly C, Joice S, et al. Art participation for psychosocial wellbeing during stroke rehabilitation: a feasibility randomised controlled trial. *Disability and Rehabilitation*. 2019;41(1):9-18.
42. Narme P, Tonini A, Khatir F, Schiaratura L, Clément S, Samson S. Thérapies non médicamenteuses dans la maladie d'Alzheimer: Comparaison d'ateliers musicaux et non musicaux = Non pharmacological treatment for Alzheimer's disease: Comparison between musical and non-musical interventions. *Gériatrie et Psychologie Neuropsychiatrie du Vieillessement*. 2012;10(2):215-215.
43. Omizo MM, Omizo SA. Art Activities to Improve Self-Esteem Among Native Hawaiian Children. *The Journal of Humanistic Education and Development*. 1989;27(4):167-176.
44. Öster I, Svensk A-C, Magnusson E, et al. Art therapy improves coping resources: A randomized, controlled study among women with breast cancer. *Palliative and Supportive Care*. 2006;4(1):57-64.
45. Öster I, Magnusson E, Thyme KE, Lindh J, Astrom S. Art therapy for women with breast cancer: the therapeutic consequences of boundary strengthening. 2007;34(3):277-288.
46. Öster I, Tavelin B, Thyme K, et al. Art therapy during radiotherapy - A five-year follow-up study with women diagnosed with breast cancer. *The Arts in Psychotherapy*. 2014;41.
47. Thyme KE, Sundin Ec Fau - Wiberg B, Wiberg B Fau - Oster I, Oster I Fau - Aström S, Aström S Fau - Lindh J, Lindh J. Individual brief art therapy can be helpful for women with breast cancer: a randomized controlled clinical study. 2009(1478-9523 (Electronic)).
48. Svensk A-C, Öster I, Thyme KE, et al. Art therapy improves experienced quality of life among women undergoing treatment for breast cancer: a randomized controlled study. *European Journal of Cancer Care*. 2009;18(1):69-77.
49. Pongan E, Tillmann B, Leveque Y, et al. Can Musical or Painting Interventions Improve Chronic Pain, Mood, Quality of Life, and Cognition in Patients with Mild Alzheimer's Disease? Evidence from a Randomized Controlled Trial. 2017;60(2):663-677.
50. Qin Y. Effect of Music Therapy Intervention on Physical Functions and Mental Health of Patients with Ankylosing Spondylitis. *Psychiatr Danub*. 2020;32(3-4):403-410.
51. Agbaria Q. Acquiring social and cognitive skills in an intervention for Arab parents of children with intellectual developmental disability accompanied by behavioral conditions. *Child & Family Social Work*. 2020;25(S1):73-82.
52. Rajendran N, Mitra TP, Shahrestani S, Coggins A. Randomized Controlled Trial of Adult Therapeutic Coloring for the Management of Significant Anxiety in the Emergency Department. *Acad Emerg Med*. 2020;27(2):92-99.
53. Ramirez K, Haen C, Cruz RF. Investigating impact: The effects of school-based art therapy on adolescent boys living in poverty. *The Arts in Psychotherapy*. 2020;71.
54. Rao D, Nainis N, Williams L, Langner D, Eisin A, Paice J. Art therapy for relief of symptoms associated with HIV/AIDS. *AIDS Care*. 2009;21(1):64-69.
55. Regev D, Guttmann J. The psychological benefits of artwork: the case of children with learning disorders. 2005;32(4):302-312.
56. Richardson P, Jones K, Evans C, Stevens P, Rowe A. Exploratory RCT of art therapy as an adjunctive treatment in schizophrenia. 2007;16(4):483-491.
57. Robinson EM, Baker R, Hossain MM. Randomized Trial Evaluating the Effectiveness of Coloring on Decreasing Anxiety Among Parents in a Pediatric Surgical Waiting Area. *J Pediatr Nurs*. 2018;41:80-83.
58. Rosal ML. Comparative group art therapy research to evaluate changes in locus of control in behavior disordered children. *The Arts in Psychotherapy*. 1993;20(3):231-241.
59. Roswiyani R, Hiew CH, Witteman CLM, Satiadarma MP, Spijker J. Art activities and qigong exercise for the well-being of older adults in nursing homes in Indonesia: a randomized controlled trial. *Aging & mental health*. 2020;24(10):1569-1578.
60. Rusted J, Sheppard L, Waller D. A Multi-centre Randomized Control Group Trial on the Use of Art Therapy for Older People with Dementia. *Group Analysis*. 2006;39(4):517-536.



61. Schrade C, Tronsky L, Kaiser DH. Physiological effects of mandala making in adults with intellectual disability. *The Arts in Psychotherapy*. 2011;38(2):109-113.
62. Schreier H, Ladakakos C, Morabito D, Chapman L, Knudson MM. Posttraumatic stress symptoms in children after mild to moderate pediatric trauma: a longitudinal examination of symptom prevalence, correlates, and parent-child symptom reporting. *J Trauma*. 2005;58(2):353-363.
63. Siegel J, Iida H, Rachlin K, Yount G. Expressive Arts Therapy with Hospitalized Children: A Pilot Study of Co-Creating Healing Sock Creatures(c). *J Pediatr Nurs*. 2016;31(1):92-98.
64. Yount G, Rachlin K, Siegel J. Expressive arts therapy for hospitalized children: a pilot study measuring cortisol levels. *Pediatr Rep*. 2013;5(2):28-30.
65. Sommer F, Obenaus K, Engelmann U. Creative-dynamic image synthesis: a useful addition to the treatment options for impotence. 2001;13(5):268-274; discussion 275.
66. Sterz C, Heimes S, Blessing T, Flachenecker P. Creative arts therapy improves quality of life in MS - Results of a randomized controlled trial during inpatient rehabilitation. 2013;19(3):176-182.
67. Sukru F, Ozturk M, Kilic O, Guneytepe S, Ucok A. The impact of a six-month interpersonal group psychotherapy on functionality of patients with schizophrenia in a community mental health center. 2018.
68. Thyme KE, Sundin EC, Stahlberg G, Lindstrom B, Eklof H, Wiberg B. The outcome of short-term psychodynamic art therapy compared to short-term psychodynamic verbal therapy for depressed women. *Psychoanalytic Psychotherapy*. 2007;21(3):250-264.
69. Tibbetts TJ, Stone B. Short-term art therapy with seriously emotionally disturbed adolescents. *The Arts in Psychotherapy*. 1990;17(2):139-146.
70. Wahlbeck H, Kvist LJ, Landgren K. Art Therapy and Counseling for Fear of Childbirth: A Randomized Controlled Trial. *Art Therapy*. 2020;37(3):123-130.
71. Wu C-J, Lee S-Y. After the intervention after the intervention an evaluation and analysis of visual art therapy in the treatment of PTSD. 2020.
72. Yamada T, Kawamata H, Kobayashi N, Kielhofner G, Taylor RR. A Randomised Clinical Trial of a Wellness Programme for Healthy Older People. *British Journal of Occupational Therapy*. 2010;73(11):540-548.
73. Yan H, Chen J, Huang J. School bullying among left-behind children: the efficacy of art therapy on reducing bullying victimization. 2019;10(FEB).
74. Yu YZ, Ming CY, Yue M, Li JH, Ling L. House-Tree-Person drawing therapy as an intervention for prisoners' prerelease anxiety. *Social Behavior and Personality: An International Journal*. 2016;44(6):987-1004.
75. Bacha A. Impact of art therapy on brain connectivity in recent post-stroke aphasia (ART-CONNECT). 2019.
76. Beauchet O, Cooper-Brown L, Hayashi Y, Galery K, Vilcoq C, Bastien T. Effects of "thursdays at the Museum" at the Montreal Museum of Fine Arts on the mental and physical health of older community dwellers: The art-health randomized clinical trial protocol. *Trials*. 2020;21(1):709.
77. Chan CKP, Lo TLT, Wan AHY, Leung PPY, Pang MYC, Ho RTH. A randomised controlled trial of expressive arts-based intervention for young stroke survivors. *BMC Complementary Medicine and Therapies*. 2021;21(1):7.
78. Drks. Art therapy as a preventive or interventional treatment for geriatric patients. In:2020.
79. Drks. Art therapy to regulate hypertension - a quantitative, controlled study. In:2018.
80. Singler K. Kunsttherapie mit älteren Menschen in Nürnberg DUERER. In: Klinikum Nürnberg/Klinik für Innere Medizin II, Schwerpunkt für Geriatrie.
81. Waller C. Psycho-biologische Behandlungseffekte traumafokussierter Maltherapie bei Patientinnen mit psychischen und physischen Traumafolgeereaktionen MALT! In: Klinikum Nürnberg; 2020.
82. Nan J. The effects of art therapy with clay on emotion regulation, stress, and hormone levels in secondary school students. In: Hong Kong Baptist University; 2020.

83. Joly F, Pasquier D, Hanzen C, et al. Impact of art therapy (AT) on fatigue and quality of life (QoL) during adjuvant external beam irradiation (EBI) in breast cancer patients (pts): a randomized trial. 2016;27:vi499-.
84. Lee S, Kim M, Seo JS, Lee K, Jon D, Bahk W. T103. THE EFFECTS OF GROUP ARTS THERAPY BASED ON EMOTION MANAGEMENT TRAINING ON THE EMOTIONAL EXPRESSION, ALEXITHYMIA, DEPRESSION AND QUALITY OF LIFE IN PATIENTS WITH SCHIZOPHRENIA...2019 Congress of the Schizophrenia International Research Society, 10-1. 2019;45:S243.
85. Matus P. Impact of waiting room art intervention on pediatric patients' anxiety and cooperation with physician. *Journal of Investigative Medicine*. 2020;68(Supplement 1).
86. Naveed A, Masood S. A comparison of group art therapy in decreasing the depression level of leukemia paediatric patients. *Pediatric Blood and Cancer*. 2020;67(SUPPL 4).
87. Paillard EB. Application of Art Therapy in Oncology: Evaluation of the Symptomatic of Patients Suffering From a Cancerous Disease (ARONCO). In: Centre Hospitalier de Perigueux; 2020.
88. Nahleh Z. Assessing the Benefit of Art & Music Therapy on Quality of Life in Patients With Breast Cancer. In: Cleveland Clinic; 2020.
89. Clavien P-A. The Effects of Perioperative Painting Art Therapy (LOM® Solution Centered Art Therapy) in Surgical Patients. In: University of Zurich; 2020.
90. Ho AHY. ARTISAN 2.0: deconstructing the Integrative Efficacy of a Multimodal Art-based Intervention. In: Nanyang Technological University, National Museum of Singapore; 2020.
91. Suleman SK, Atrushi A, Enskar K. Effectiveness of art-based distraction in reducing pain and anxiety of hospitalized children during cannulation procedure: A randomized controlled trial. *Belitung Nurs J*. 2022;8(3):213-221.
92. Pieper C, Schroer S, Spanier H, Cohen S, Russ H, Baer U. The UPGRADE study protocol: creative strengthening groups as an innovative preventive intervention for healthcare workers. 2020;70(11):475-480.
93. Gohier B. Impact of Art Therapy on Alexithymia in People With Alcohol Use Disorder. In. <https://clinicaltrials.gov/show/NCT04206930>: University Hospital Angers; 2019.
94. Page MJ, McKenzie JE, Bossuyt PM, et al. The PRISMA 2020 statement: an updated guideline for reporting systematic reviews. *Systematic Reviews*. 2021;10(1).
