# Supplementary material for: Active Visual Art Therapy and Health Outcomes: A Systematic Review and Meta-Analysis
Source: PubMed Central journal article supplement (PMC11393726; doi:10.1001/jamanetworkopen.2024.28709), 2024-09-12
Supplement: jamanetwopen-e2428709-s003.pdf [file jamanetwopen-e2428709-s003.pdf]

## Data Sharing Statement

Joschko. Active Visual Art Therapy and Health Outcomes. *JAMA Netw Open*. Published September 12, 2024. doi:10.1001/jamanetworkopen.2024.28709

### Data

**Data available:** No

### Additional Information

**Explanation for why data not available:** The datasets used during this review are available from the corresponding author upon reasonable request.
